# Supplementary material
Source: publisher figshare collection journal article supplement (https://asha.figshare.com/articles/dataset/_/7616312)
Supplement: Supplementary file 1 [file 1]

## Supplemental Material S2. Group differences in MLU and TTR.

| Measure | Home Conversation |           | SLP Conversation |           | <i>t</i> | <i>df</i> | <i>p</i> |
|---------|-------------------|-----------|------------------|-----------|----------|-----------|----------|
|         | <i>M</i>          | <i>SD</i> | <i>M</i>         | <i>SD</i> |          |           |          |
| MLU     | 4.0475            | ± 0.9656  | 3.9675           | ± 0.9334  | .339     | 7         | .744     |
| TTR     | .3350             | ± .0949   | .3250            | ± .0854   | .546     | 7         | .602     |

*Note.* MLU = mean length of utterance (Brown, 1973); TTR = type token ratio (Johnson, 1944).

## References

- Brown, R. (1973). *A first language: The early stages*. Cambridge, MA: Harvard University Press.
- Johnson, W. (1944). Studies in language behavior: I. A program of research. *Psychological Monographs*, 56, 1–15.
