# Supplementary material
Source: publisher figshare collection journal article supplement (https://asha.figshare.com/articles/dataset/_/7616312)
Supplement: Supplementary file 2 [file 1]

**Supplemental Material S1.** Wilcoxon signed-ranks test results comparing frequency of content words across conversations.

| Participant | Severity/Type of aphasia    | <i>n</i> (for each conversation) | <i>Z</i> | <i>p</i> |
|-------------|-----------------------------|----------------------------------|----------|----------|
| P1          | Moderate anomia             | 88                               | −0.724   | .469     |
| P2          | Mild anomia/mod AoS         | 102                              | −1.217   | .224     |
| P3          | Severe Wernicke             | 81                               | −0.830   | .406     |
| P4          | Mild anomia/mild AoS        | 136                              | −0.904   | .366     |
| P5          | Moderate TCM                | 57                               | −0.214   | .831     |
| P6          | Mild anomia/mild dysarthria | 72                               | −1.056   | .291     |
| P7          | Mild anomia                 | 70                               | −0.079   | .937     |
| P8          | Mild anomia                 | 110                              | −1.837   | .066     |

*Note.* AoS = apraxia of speech; TCM = transcortical motor aphasia; *n* = number of content words compared for each person with aphasia (PWA) across conversations. Each PWA's conversations contained different numbers of words, however the Wilcoxon signed-ranks test requires the same number of words to be compared in each conversation; for example, for P1 the first 88 content words of each conversation were compared.
